# Supplementary material for: Next Generation Sequencing of Genotype Variants and Genetic Association between Heat Shock Proteins HSPA1B Single Nucleotide Polymorphism at the g.31829044 Locus and Heat Tolerance: A Pilot Quasi-Experimental Study
Source: MDPI journal article supplement (doi:10.3390/biom12101465), 2022-10-12
Supplement: s1 [file s1]

**Table S1.** Primer sequences for polymerase chain reaction assays.

| Gene            |         | Sequence                          | Length (bp) | T <sub>a</sub> (°C) | Fragment length (bp) |
|-----------------|---------|-----------------------------------|-------------|---------------------|----------------------|
| <i>HSPA1B</i>   | Forward | GAG GGT CCG CTT CGT CTT TCG       | 21          | 60°C                | 2517                 |
|                 | Reverse | TGT AGT GTT TTC GCC AAG CAA AAA   | 24          |                     |                      |
| <i>HSP90AA2</i> | Forward | ACC GGG TCT GAG TTA TTT TTA AAC A | 25          | 60°C                | 2922                 |
|                 | Reverse | AGG AGG AGG TTG AGA CAT TCG C     | 22          |                     |                      |
| <i>DNAJA1</i>   | Forward | CTT TCC AGA ACG CTC GGT GAG A     | 22          | 60°C                | 14635                |
|                 | Reverse | GCG AAA GTC AAA TGG TTT AAA GTA A | 25          |                     |                      |

**Table S2.** HSP SNP genotypes and major allele frequencies.

| Gene            | SNP locus     | Genotype | Major allele frequency (%) |
|-----------------|---------------|----------|----------------------------|
| <i>HSPA1B</i>   | g.31829044G>A | AG       | 62                         |
|                 | g.31829851G>C | CG       | 51                         |
| <i>HSP90AA2</i> | g.27889377T>A | AA       | 85                         |
|                 | g.27890100C>T | TT       | 85                         |
|                 | g.27890332T>C | CC       | 85                         |
